# Supplementary material for: A low-barrier hydrogen bond mediates antibiotic resistance in a noncanonical catalytic triad
Source: PubMed Central journal article supplement — Sci Adv. 2018 Apr 4;4(4):eaas8667. doi: 10.1126/sciadv.aas8667 (PMC5884680; doi:10.1126/sciadv.aas8667), 2018-04-04
Supplement: aas8667_SM.pdf [file aas8667_SM.pdf]

## Supplementary Materials for

### **A low-barrier hydrogen bond mediates antibiotic resistance in a noncanonical catalytic triad**

Prashasti Kumar, Engin H. Serpersu, Matthew J. Cuneo

Published 4 April 2018, *Sci. Adv.* **4**, eaas8667 (2018)

DOI: 10.1126/sciadv.aas8667

#### **This PDF file includes:**

- fig. S1. Overall structure of apo acetyltransferase AAC-VIa.
- fig. S2. Kinetics and homologs of AAC-VIa.
- fig. S3. The binary AAC-VIa–CoASH complex.
- fig. S4. Overlay of ternary enzyme–CoASH–sisomicin complex with binary complexes of the enzyme with CoASH, acetyl-CoA, and sisomicin.
- fig. S5. Sisomicin-mediated ordering of acetyl-CoA binding site.

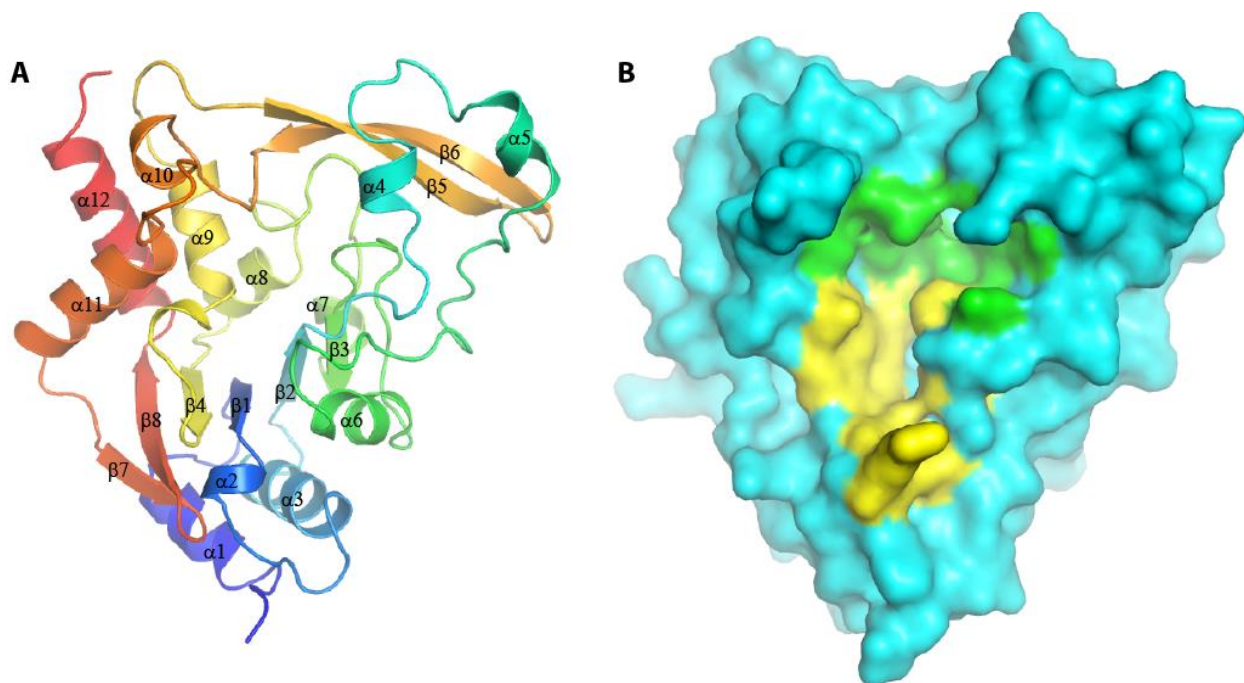

**fig. S1. Overall structure of apo acetyltransferase AAC-VIa.** (A) Ribbon representation of AAC-VIa with ordering of secondary structure elements indicated from N- to C-terminus. (B) Surface representation of apo AAC-VIa. Two large cavities present in the apo AAC-VIa are indicated by green and yellow surfaces.

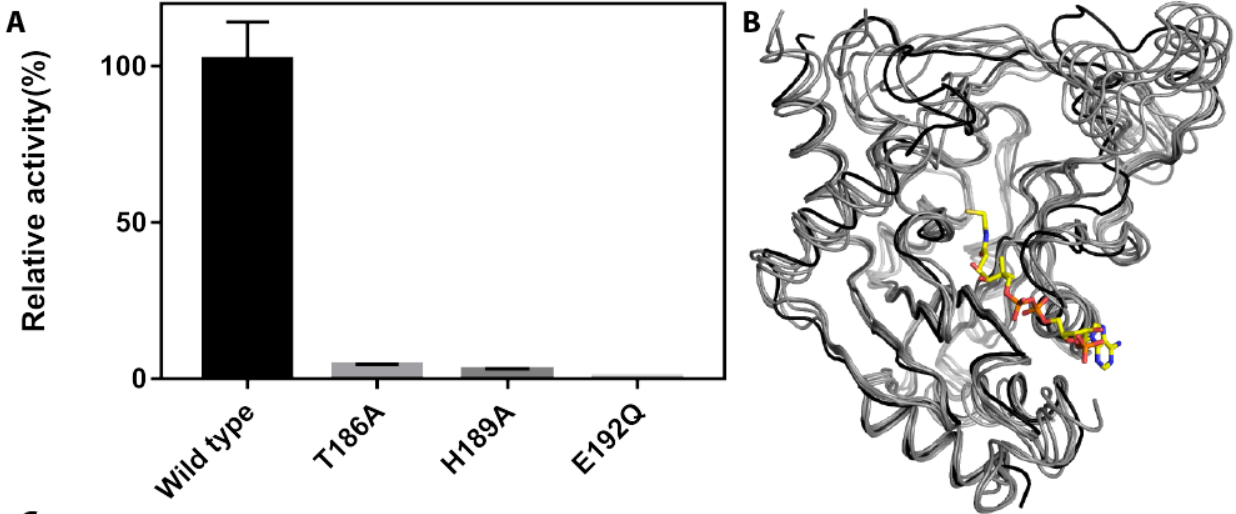

**C**

```

3E4F -----NDIVASTQLPN---TIKTITNDLRKLGLKKGMTVIVHSSLSSIGWISGGAVA 50
2NYG -----SLKKIVESTTFPR---TKQSITEDLKALGLKKGMTVLVHSSLSSIGWVNGGAVA 51
3SMA MIRHIDARREDLEPDRQDRELVTDRDLASDLAALGVRPGGVLLVHASLSALGWVCGGAQA 60
5HT0 -----MSSRVSTRSSLAEDLRAIGLADGDAVLVHAALRKVKIVGGPDD 44
AAC-II Ib -----MTSATASFATRTSLAADLAALGLAWGDAIMVHAAVSRVGRLLDGPDT 46
AAC-VIa -MTDPRKNGDLHEPATAPATPWSKSELVRLDLGVRSGDMVMPHVSLRAVGPLADGPQT 59
: . . : * : * : : * : : * : : . * .
3E4F VVEALMEVITEEGTIIMPTQSSDLSDPKHWSRPPVPEEWWQIIRDNVPAFEPHITP-TRA 109
2NYG VIQALIDVVTTEEGTIVMPSQSVELSDPKKEWGNPPVPEEWWDI IRESMPAYNSNYTPTTRG 111
3SMA VVLALQDAVGKEGTLVMPTFSGLSDPSTWRRPPVPEDWWPVIREQMPPFPDPLTP-TRG 119
5HT0 ILDAMRDVIGPAGTVLGYADWQ----LEDEIRDD-----PAMREHIPAFDPLRSRSIRD 94
AAC-II Ib IIAALRDIVGPGGTVLAYADWE----ARYEDLVDDAGRVPPEWREHVPPFPDQRSAIRD 103
AAC-VIa LVDALIEAVGPTGNILAFVSWR----DSPYEQTLGHDAPPAAIAQSWPAFDPDHAPAYPG 115
: : * : : : * : : : : * : : : :
3E4F MGKVVECFRTYPNVVRSNHPGLGSFAAWGRHAEITVNQSLSMSLGEESPLRKIYDLGDYI 169
2NYG MGQIVELFRSYPEVKRSNHPNYSFVAWGKHKNKILNQHPLEFGLGEQSPLGKLYIRESYV 171
3SMA MGVAEACFRRAAGAVRSRSGHPQNSFAAWGAHAEQVVAEHGLTERLGRGSPLEQVYRLDGQV 179
5HT0 NGFWPELIRTTTPGALRSASPASMAAIGGEAEWFTADHALDYGYPGRSPLGKLVEAKGKV 154
AAC-II Ib NGVLPEFLRTPGTLRSGNPGASLVALGAKAEWFTADHPLDYGYGEGSPLAKLVEAGGKV 163
AAC-VIa FGAINEFIRTYPGCRRTAHPDASMAAIGPDAAWLVAPHEMGAAYGPRSP IARFLAHAGKI 175
* * : * . : * * * : * * . . : : * ** : : . :
3E4F LLIQVGYDSNTTSVHLSEVR--SGACELIKVGAPIIENGERVWKEFVDMDDYD----- 218
2NYG LLLGADFDSSTCFHLAEYR--IPYQKIINRGAPIIVEGKRVWKEYKELEFR----- 220
3SMA LLLGCGFESNTSFHLAEYRTAYPGRRSHRRRVVPVEGDRVRWVEQEDIVYF----- 230
5HT0 LMLGAPLDTMLLHHAEHLADFPNKRIILRYEAPIILVDGEKVVWRWFEEFDTS---DPPDG- 210
AAC-II Ib LMLGAPLDTMLLHHAEHLADIPGKRIKRIEVPFATPTGTQWRMIEEFDTG---DPIVAG 220
AAC-VIa LSIGAGPDAVTALHYAEAVARIEGKRRVTYSMPLLREGKRVWVTSDWDSNGILDEYAAP 235
* * : : * * : * . * : :
3E4F --SDKFVEIGVEFEQKGT-VTMGKIGNAKCRLMKQRDIVDFGTEWFRKKN----- 265
2NYG --EELFQEVGQAFEAEHN-MKVGKVGSANCRFLSLTEAVDFAEKWFINNDSKNIKK---- 273
3SMA --EEDFQTMGESCLTRTPGHSRGTVGEAAVLYGQRAFVDLACEWMTAHRDLARAVGA-- 286
5HT0 LADDYFAGIVEEFLATGR-GKRKLGIEASSVLVPADEIVAFAVDWLERWGRTAR---- 263
AAC-II Ib LAEDYFAGIVTEFLASGQ-GRQGLIGAAPSVLVDAAAITAFGVTWLEKRFGTSP---- 274
AAC-VIa DGPEDAVERIARDYLARTR-VAQGPVGGAQSRLIDAADIVSFGIEWLEARHAAPAAAALKP 294
: . : * : * * . * . : : * :

```

**fig. S2. Kinetics and homologs of AAC-VIa.** (A) Steady state kinetics of AAC-VIa and the three active site mutants. (B) Structural superimposition of closest AAC-VIa structural homologs identified by the DALI server. (C) Sequence alignment of AAC-VIa structural homologs. The active site catalytic triad in AAC-VIa is highlighted in magenta, antibiotic binding site residues in green and acetyl-CoA binding residues in orange.

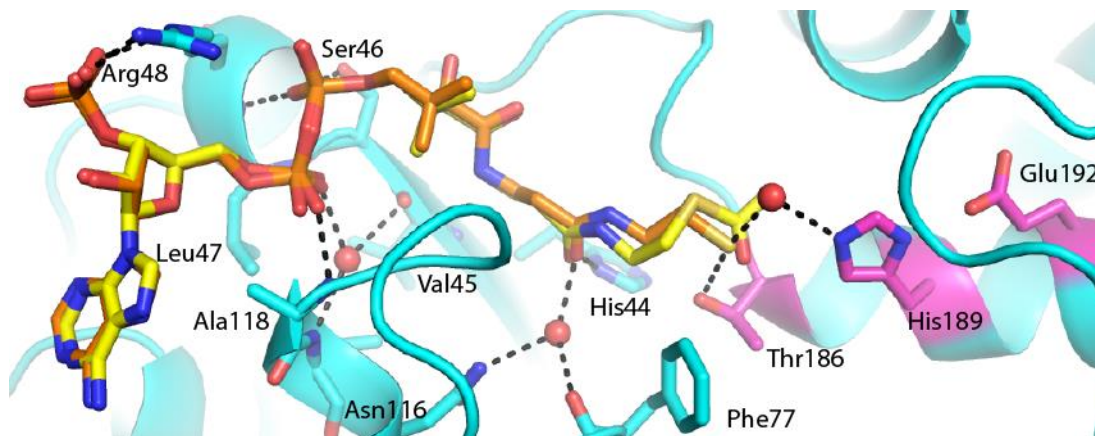

**fig. S3. The binary AAC-VIa-CoASH complex.** Close-up view of CoASH (orange carbon atoms) interaction with AAC-VIa. The CoASH is superimposed with the acetyl-CoA (yellow carbon atoms) from the binary enzyme-acetyl-CoA structure. Hydrogen bonds are represented as black dashed lines and water molecules are shown as red spheres. The active site residues have carbon atoms colored magenta.

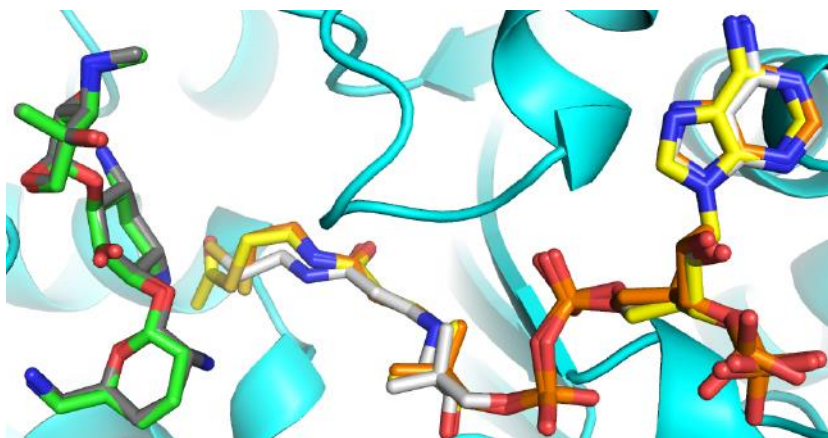

**fig. S4. Overlay of ternary enzyme-CoASH-sisomicin complex with binary complexes of the enzyme with CoASH, acetyl-CoA, and sisomicin.** The ligands of the ternary enzyme-CoASH-sisomicin (orange/green carbon atoms) complex are found in the same conformation as in the binary enzyme-sisomicin (dark grey carbon atoms) and enzyme-acetyl-CoA (yellow carbon atoms) complexes. The pantetheine tail of the CoASH in the binary enzyme-CoASH (light grey carbon atoms) is found in a different conformation than the CoASH in the binary and ternary complexes.

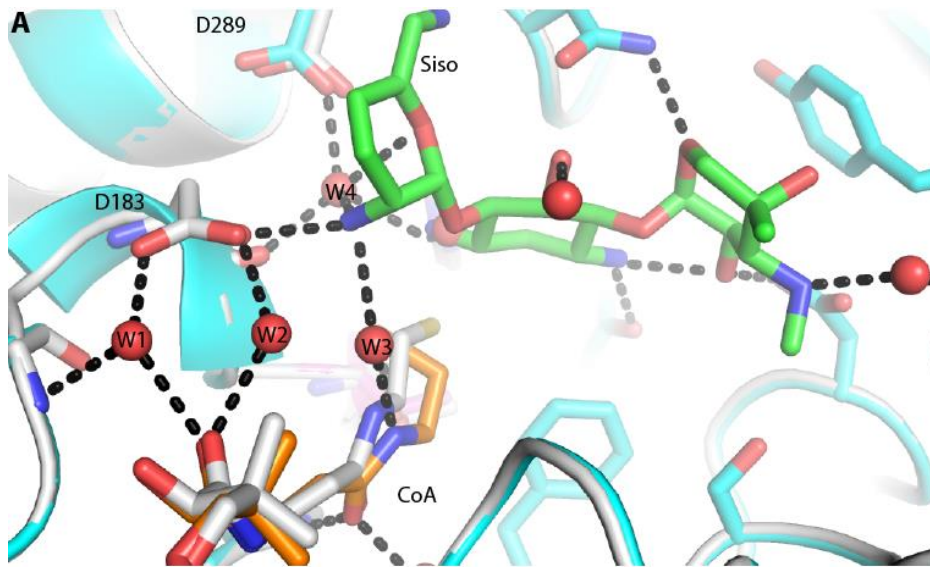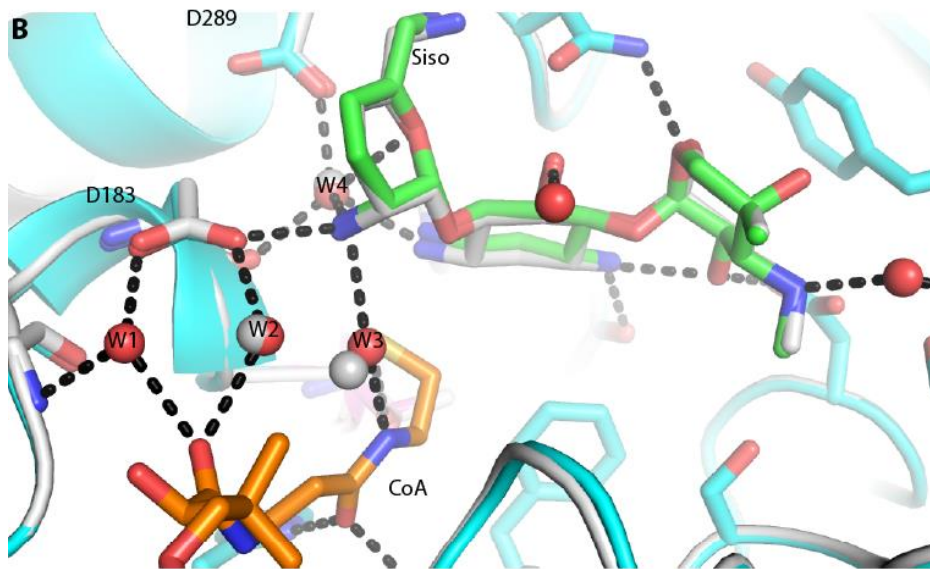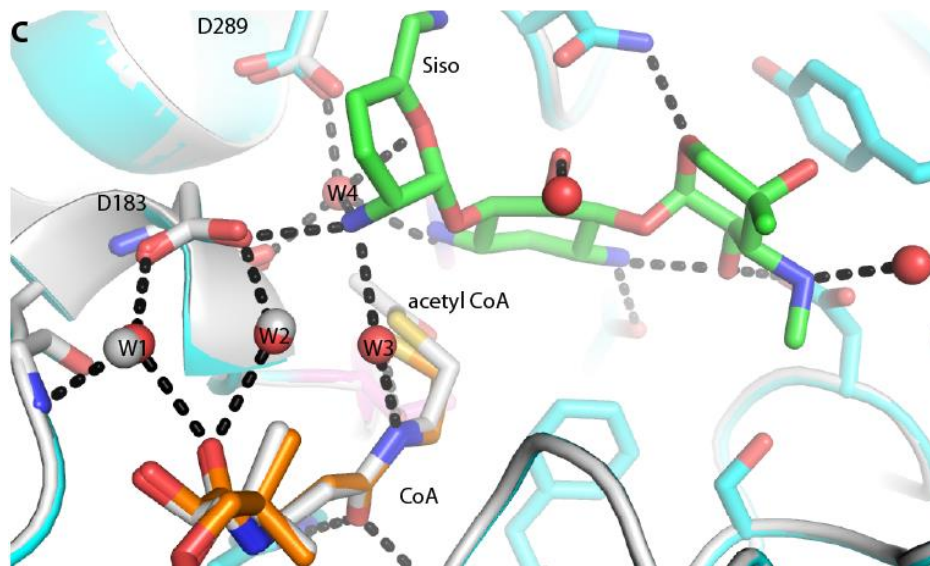

**fig. S5. Sisomicin-mediated ordering of acetyl-CoA binding site.** (A) Superposition of the structures of the binary enzyme–CoASH complex (grey carbon atoms) with the ternary enzyme–CoASH–sisomicin complex (cyan protein carbon atoms, with sisomicin carbon atoms colored green and CoASH carbon atoms colored orange). Substrate waters 1–4 are absent in the binary complex. (B) Superposition of the enzyme–sisomicin (grey carbon atoms) structure with the ternary enzyme–CoASH–sisomicin complex (cyan protein carbon atoms, with sisomicin carbon atoms colored green and CoASH carbon atoms colored orange). Substrate waters 2–4 are present in the binary complex. (C) Superposition of the enzyme–acetyl-CoA binary (grey carbon atoms) structure with the ternary enzyme–CoASH–sisomicin complex (cyan protein carbon atoms, with sisomicin carbon atoms colored green and CoASH carbon atoms colored orange) structure. Substrate waters 1 and 2 are present in the binary complex.
